# Supplementary material for: Capturing an unstable C100fullerene as chloride, C100(1)Cl12, with a nanotubular carbon cage
Source: Royal Society of Chemistry journal article supplement (doi:10.1039/c4cc06825d), 2014-09-19
Supplement: c4cc06825d1.pdf [file c4cc06825d1.pdf]

## Supplementary Information

### Isolation and analysis of C<sub>100</sub> containing fractions

The fullerene soot was synthesized by a Krätschmer-Huffman DC-arc discharging method with undoped graphite rods. About 100 g soot was Soxhlet extracted by toluene for *ca.* two weeks. The solution contained mainly C<sub>60</sub>, C<sub>70</sub> and small amounts of higher fullerene up to C<sub>96</sub> according to MALDI-TOF mass spectrometry. This toluene extract was not used. The remaining soot was Soxhlet extracted by *o*-dichlorobenzene for further two weeks. The MALDI MS analyses showed the presence of C<sub>60</sub>, C<sub>70</sub> and larger amounts of higher fullerenes up to C<sub>130</sub>. The *o*-dichlorobenzene solution was dried in vacuum at heating at 150°C. The solid was partially dissolved in toluene and subjected to HPLC separation using a preparative Buckyprep column (20 × 250 mm, Nacalai Tesque, Japan; flow rate 25.0 mL min<sup>-1</sup>; injection volume 10 mL) and toluene as the eluent (Fig. S1). The several fractions have been collected with elution time up to 120 min. The fraction collected between 84 and 92 min contained C<sub>100</sub> and C<sub>106</sub>-C<sub>112</sub> fullerenes (Fig. S2). It was further separated by recycling HPLC with a semi-preparative Buckyprep column (10 × 250 mm, Nacalai Tesque, Japan) in toluene at flow rate at 6.9 mL min<sup>-1</sup> (injection volume 5 mL) affording several subfractions (Fig. S3) as mixtures of C<sub>100</sub> and C<sub>106</sub>-C<sub>112</sub> fullerenes in different proportions according to MALDI-TOF MS data. The central subfraction **B** contained mainly C<sub>100</sub> and smaller amounts of C<sub>108</sub> and C<sub>110</sub> fullerenes (Fig. S4). Concentration of subfraction B resulted in precipitation of black solid which was shown to be pure C<sub>100</sub> fullerene (Fig. S5).

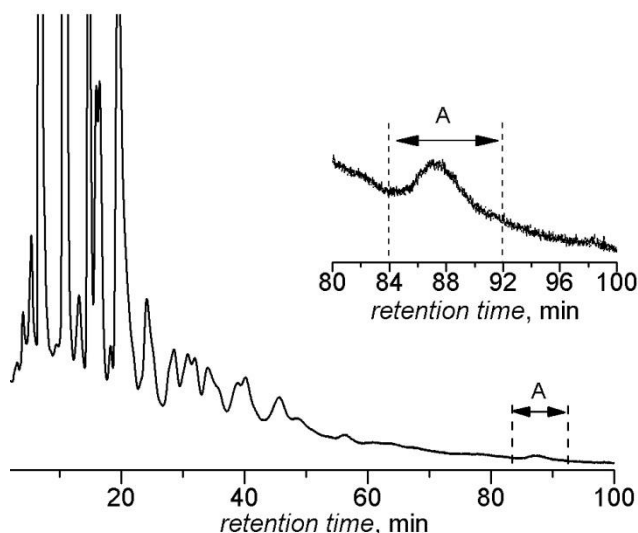

Fig. S1 HPLC trace of the *o*-dichlorobenzene extract recorded in toluene. Fraction A has been collected between 84 and 92 min.

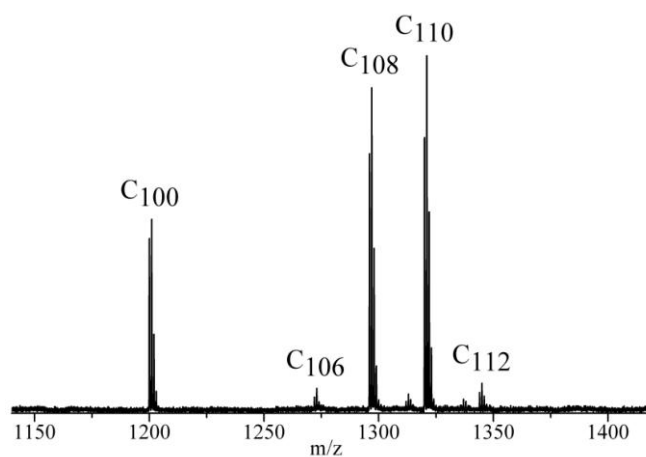

Fig. S2 Negative MALDI-TOF mass spectra of fraction **A** showing the presence of C<sub>100</sub> and C<sub>106</sub>-C<sub>112</sub> fullerenes.

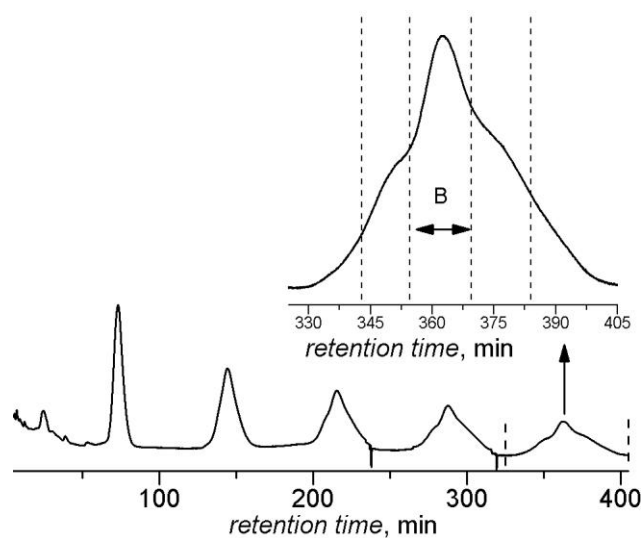

Fig. S3 Recycling HPLC of the fraction **A** in toluene. Fraction **B** has been collected

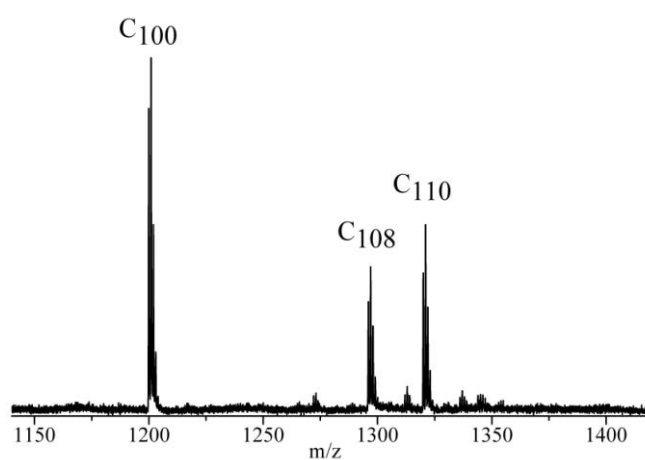

Fig. S4 Negative MALDI-TOF mass spectra of subfraction **B** showing the presence of mainly C<sub>100</sub> still admixed with other higher fullerenes.

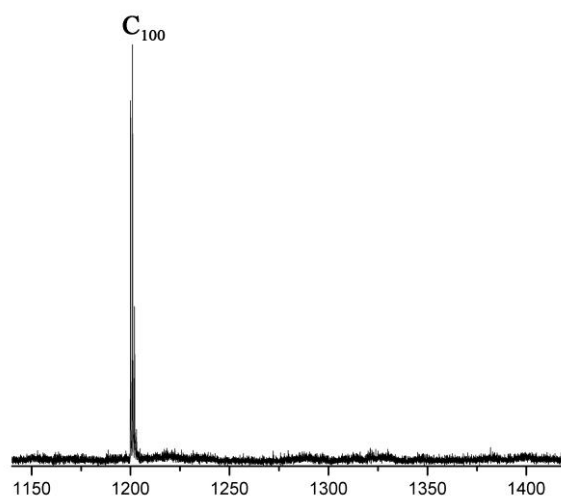

Fig. S5 Negative MALDI-TOF mass spectra of the solid precipitated from subfraction **B** evidencing the presence of pure C<sub>100</sub>.

Subfraction **B** and the solid precipitated from it were used for chlorination in ampoules with excess VCl<sub>4</sub> plus a drop of SbCl<sub>5</sub> as chlorinating agent affording red-coloured, plate-like crystals of C<sub>100</sub>Cl<sub>12</sub>·2SbCl<sub>5</sub>. The presence of vanadium chloride as solvated molecule was excluded based of the EDX analysis with a JEOL JSM-6060 instrument (Fig. S6).

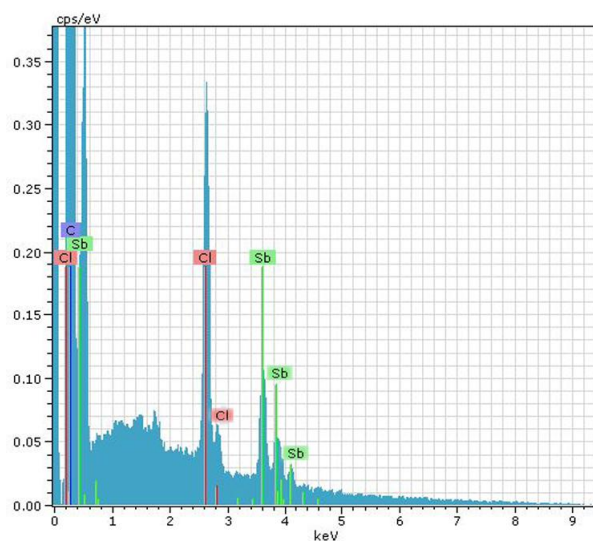

Fig. S6. EDX analysis of the crystal used for X-ray diffraction study demonstrating the presence of only C, Cl, and Sb elements.
